# Supplementary material
Source: PubMed Central journal article supplement (PMC3288714)
Supplement: NIHMS346255-supplement-1.pdf [file NIHMS346255-supplement-1.pdf]

**SUPPLEMENTAL MATERIAL**

**Supplemental Table 2A. Reclassification Tables for Clinical Model + UACR vs Clinical Model**

|                         |         | Clinical Model + UACR |            |            |       |                |
|-------------------------|---------|-----------------------|------------|------------|-------|----------------|
|                         |         | <5%                   | 5-9.99%    | ≥10%       | Total | % Reclassified |
| Clinical Model<br>N (%) | <5%     | 21 (80.8%)            | 3 (11.5%)  | 2 (7.7%)   | 26    | 19.2           |
|                         | 5-9.99% | 5 (9.8%)              | 34 (66.7%) | 12 (23.5%) | 51    | 33.3           |
|                         | ≥10%    | 0 (0%)                | 8 (14.5)   | 47 (85.5%) | 55    | 14.5           |
| Total                   |         |                       |            |            | 132   |                |

|                         |         | Clinical Model + UACR |             |             |       |                |
|-------------------------|---------|-----------------------|-------------|-------------|-------|----------------|
|                         |         | <5%                   | 5-9.99%     | ≥10%        | Total | % Reclassified |
| Clinical Model<br>N (%) | <5%     | 889 (89.0%)           | 109 (10.9%) | 1 (0.1%)    | 999   | 11.0           |
|                         | 5-9.99% | 97 (13.8%)            | 532 (75.9%) | 72 (10.3%)  | 701   | 24.1           |
|                         | ≥10%    | 0 (0%)                | 85 (17.9%)  | 389 (82.1%) | 474   | 17.9           |
| Total                   |         |                       |             |             | 2,174 |                |

**Supplemental Table 2B. Reclassification Tables for Clinical Model + HbA1c vs Clinical Model**

|                         |         | Clinical Model + HbA1c |            |            |       |                |
|-------------------------|---------|------------------------|------------|------------|-------|----------------|
|                         |         | <5%                    | 5-9.99%    | ≥10%       | Total | % Reclassified |
| Clinical Model<br>N (%) | <5%     | 18 (69.2%)             | 8 (30.8%)  | 0 (0%)     | 26    | 30.8           |
|                         | 5-9.99% | 5 (9.8%)               | 35 (68.6%) | 11 (21.6%) | 51    | 31.4           |
|                         | ≥10%    | 0 (0%)                 | 6 (10.9%)  | 49 (89.1%) | 55    | 10.9           |
| Total                   |         |                        |            |            | 132   |                |

|                         |         | Clinical Model + HbA1c |             |             |       |                |
|-------------------------|---------|------------------------|-------------|-------------|-------|----------------|
|                         |         | <5%                    | 5-9.99%     | ≥10%        | Total | % Reclassified |
| Clinical Model<br>N (%) | <5%     | 873 (87.4%)            | 126 (12.6%) | 0 (0%)      | 999   | 12.6           |
|                         | 5-9.99% | 112 (16.0%)            | 474 (67.6%) | 114 (16.4%) | 701   | 32.4           |
|                         | ≥10%    | 3 (0.6%)               | 102 (21.5%) | 369 (77.8%) | 474   | 22.1           |
| Total                   |         |                        |             |             | 2,174 |                |

**Supplemental Table 2C. Reclassification Tables for Clinical Model + HbA1c + UACR vs Clinical Model**

| Stroke                  |         | Clinical Model + HbA1c + UACR |            |            |       |                |
|-------------------------|---------|-------------------------------|------------|------------|-------|----------------|
|                         |         | <5%                           | 5-9.99%    | ≥10%       | Total | % Reclassified |
| Clinical Model<br>N (%) | <5%     | 18 (69.2%)                    | 7 (26.9%)  | 1 (3.8%)   | 26    | 30.7           |
|                         | 5-9.99% | 10 (19.6%)                    | 28 (54.9%) | 13 (25.5%) | 51    | 45.1           |
|                         | ≥10%    | 0 (0%)                        | 10 (18.2%) | 45 (81.8%) | 54    | 18.2           |
| Total                   |         |                               |            |            | 132   |                |

| No Stroke               |         | Clinical Model + HbA1c + UACR |             |             |       |                |
|-------------------------|---------|-------------------------------|-------------|-------------|-------|----------------|
|                         |         | <5%                           | 5-9.99%     | ≥10%        | Total | % Reclassified |
| Clinical Model<br>N (%) | <5%     | 869 (87.0%)                   | 129 (12.9%) | 1 (0.1%)    | 999   | 13.0           |
|                         | 5-9.99% | 142 (20.3%)                   | 447 (63.8%) | 112 (16.0%) | 701   | 36.3           |
|                         | ≥10%    | 5 (1.1%)                      | 112 (23.6%) | 357 (75.3%) | 474   | 24.7           |
| Total                   |         |                               |             |             | 2,174 |                |

**Supplemental Table 2D. Reclassification Tables for Clinical Model + HbA1c + UACR vs Clinical Model + HbA1c**

| Stroke                             |         | Clinical Model + HbA1c + UACR |            |            |       |                |
|------------------------------------|---------|-------------------------------|------------|------------|-------|----------------|
|                                    |         | <5%                           | 5-9.99%    | ≥10%       | Total | % Reclassified |
| Clinical Model +<br>HbA1c<br>N (%) | <5%     | 19 (82.6%)                    | 4 (17.4%)  | 0 (0%)     | 23    | 17.4           |
|                                    | 5-9.99% | 9 (18.4%)                     | 34 (69.4%) | 6 (12.2%)  | 49    | 30.6           |
|                                    | ≥10%    | 0 (0%)                        | 7 (11.7%)  | 53 (88.3%) | 60    | 11.7           |
| Total                              |         |                               |            |            | 132   |                |

| No Stroke                        |         | Clinical Model + HbA1c + UACR |             |             |       |                |
|----------------------------------|---------|-------------------------------|-------------|-------------|-------|----------------|
|                                  |         | <5%                           | 5-9.99%     | ≥10%        | Total | % Reclassified |
| Clinical Model<br>HbA1c<br>N (%) | <5%     | 937 (94.8%)                   | 51 (5.2%)   | 0 (0%)      | 988   | 5.2            |
|                                  | 5-9.99% | 79 (11.3%)                    | 565 (80.5%) | 58 (8.3%)   | 702   | 19.6           |
|                                  | ≥10%    | 0 (0%)                        | 72 (14.9%)  | 412 (85.1%) | 484   | 14.9           |
| Total                            |         |                               |             |             | 2,174 |                |

**Supplemental Table 2E. Reclassification Tables for Clinical Model + LA vs Clinical Model**

| Stroke                  |         | Clinical Model + LA |            |            | Total | % Reclassified |
|-------------------------|---------|---------------------|------------|------------|-------|----------------|
|                         |         | <5%                 | 5-9.99%    | ≥10%       |       |                |
| Clinical Model<br>N (%) | <5%     | 23 (92.0%)          | 2 (8.0%)   | 0 (0%)     | 25    | 8.0            |
|                         | 5-9.99% | 7 (13.2%)           | 34 (64.2%) | 12 (22.6%) | 53    | 35.8           |
|                         | ≥10%    | 0 (0%)              | 4 (6.8%)   | 55 (93.2%) | 59    | 6.8            |
| Total                   |         |                     |            |            | 137   |                |

| No Stroke               |         | Clinical Model + LA |             |             | Total | % Reclassified |
|-------------------------|---------|---------------------|-------------|-------------|-------|----------------|
|                         |         | <5%                 | 5-9.99%     | ≥10%        |       |                |
| Clinical Model<br>N (%) | <5%     | 883 (86.5%)         | 138 (13.5%) | 0 (0%)      | 1021  | 13.5           |
|                         | 5-9.99% | 113 (13.2%)         | 527 (72.3%) | 89 (12.2%)  | 729   | 27.7           |
|                         | ≥10%    | 0 (0%)              | 84 (17.4%)  | 400 (82.6%) | 484   | 17.4           |
| Total                   |         |                     |             |             | 2,234 |                |

**Supplemental Table 2F. Reclassification Tables for Clinical Model + MAC vs Clinical Model**

| Stroke                  |         | Clinical Model + MAC |            |            | Total | % Reclassified |
|-------------------------|---------|----------------------|------------|------------|-------|----------------|
|                         |         | <5%                  | 5-9.99%    | ≥10%       |       |                |
| Clinical Model<br>N (%) | <5%     | 25 (100%)            | 0 (0%)     | 0 (0%)     | 25    | 0              |
|                         | 5-9.99% | 4 (7.5%)             | 42 (79.2%) | 7 (13.2%)  | 53    | 20.7           |
|                         | ≥10%    | 0 (0%)               | 2 (3.4%)   | 57 (96.6%) | 59    | 3.4            |
| Total                   |         |                      |            |            | 137   |                |

| No Stroke               |         | Clinical Model + MAC |             |             | Total | % Reclassified |
|-------------------------|---------|----------------------|-------------|-------------|-------|----------------|
|                         |         | <5%                  | 5-9.99%     | ≥10%        |       |                |
| Clinical Model<br>N (%) | <5%     | 985 (96.5%)          | 36 (3.5%)   | 0 (0%)      | 1021  | 3.5            |
|                         | 5-9.99% | 37 (5.1%)            | 655 (89.8%) | 37 (5.1%)   | 729   | 10.2           |
|                         | ≥10%    | 1 (0.2%)             | 45 (9.3%)   | 439 (90.7%) | 484   | 9.3            |
| Total                   |         |                      |             |             | 2,234 |                |

**Supplemental Table 2G. Reclassification Tables for Clinical Model + LA + MAC vs Clinical Model**

| Stroke                  |         | Clinical Model + LA + MAC |            |            |       |                |
|-------------------------|---------|---------------------------|------------|------------|-------|----------------|
|                         |         | <5%                       | 5-9.99%    | ≥10%       | Total | % Reclassified |
| Clinical Model<br>N (%) | <5%     | 22 (88.0%)                | 3 (12.0%)  | 0 (0%)     | 25    | 12.0           |
|                         | 5-9.99% | 8 (15.1%)                 | 32 (60.4%) | 13 (24.5%) | 53    | 39.6           |
|                         | ≥10%    | 0 (0%)                    | 4 (6.8%)   | 55 (93.2%) | 59    | 6.8            |
| Total                   |         |                           |            |            | 137   |                |

| No Stroke               |         | Clinical Model + LA + MAC |             |             |       |                |
|-------------------------|---------|---------------------------|-------------|-------------|-------|----------------|
|                         |         | <5%                       | 5-9.99%     | ≥10%        | Total | % Reclassified |
| Clinical Model<br>N (%) | <5%     | 882 (86.4%)               | 137 (13.4%) | 2 (0.2%)    | 1021  | 13.6           |
|                         | 5-9.99% | 128 (17.6%)               | 500 (68.6%) | 101 (13.9%) | 729   | 31.4           |
|                         | ≥10%    | 0 (0%)                    | 94 (19.4%)  | 390 (80.6%) | 484   | 19.4           |
| Total                   |         |                           |             |             | 2,234 |                |

**Supplemental Table 2H. Reclassification Tables for Clinical Model + LA + HbA1c vs Clinical Model**

| Stroke                  |         | Clinical Model + LA + HbA1c |            |            |       |                |
|-------------------------|---------|-----------------------------|------------|------------|-------|----------------|
|                         |         | <5%                         | 5-9.99%    | ≥10%       | Total | % Reclassified |
| Clinical Model<br>N (%) | <5%     | 18 (69.2%)                  | 8 (30.8%)  | 0 (0%)     | 26    | 30.8           |
|                         | 5-9.99% | 9 (17.3%)                   | 23 (44.2%) | 20 (38.5%) | 52    | 55.8           |
|                         | ≥10%    | 0 (0%)                      | 6 (11.3%)  | 47 (88.7%) | 53    | 11.3           |
| Total                   |         |                             |            |            | 131   |                |

| No Stroke               |         | Clinical Model + LA + HbA1c |             |             |       |                |
|-------------------------|---------|-----------------------------|-------------|-------------|-------|----------------|
|                         |         | <5%                         | 5-9.99%     | ≥10%        | Total | % Reclassified |
| Clinical Model<br>N (%) | <5%     | 789 (80.8%)                 | 180 (18.4%) | 7 (0.7%)    | 976   | 19.1           |
|                         | 5-9.99% | 152 (20.7%)                 | 413 (56.2%) | 170 (23.1%) | 735   | 43.8           |
|                         | ≥10%    | 7 (1.6%)                    | 88 (19.8%)  | 349 (78.6%) | 444   | 21.4           |
| Total                   |         |                             |             |             | 2,155 |                |

**Supplemental Table 2I. Reclassification Tables for Clinical Model + LA + HbA1c vs Clinical Model + HbA1c**

| Stroke                             |         | Clinical Model + LA + HbA1c |            |            | Total | % Reclassified |
|------------------------------------|---------|-----------------------------|------------|------------|-------|----------------|
|                                    |         | <5%                         | 5-9.99%    | ≥10%       |       |                |
| Clinical Model +<br>HbA1c<br>N (%) | <5%     | 18 (78.3%)                  | 5 (21.7%)  | 0 (0%)     | 23    | 21.7           |
|                                    | 5-9.99% | 9 (18.8%)                   | 25 (52.1%) | 14 (29.2%) | 48    | 48.0           |
|                                    | ≥10%    | 0 (0%)                      | 7 (11.7%)  | 53 (88.3%) | 60    | 11.7           |
| Total                              |         |                             |            |            | 131   |                |

| No Stroke                          |         | Clinical Model + LA + HbA1c |             |             | Total | % Reclassified |
|------------------------------------|---------|-----------------------------|-------------|-------------|-------|----------------|
|                                    |         | <5%                         | 5-9.99%     | ≥10%        |       |                |
| Clinical Model +<br>HbA1c<br>N (%) | <5%     | 846 (86.1%)                 | 136 (13.8%) | 1 (0.1%)    | 983   | 13.9           |
|                                    | 5-9.99% | 101 (14.6%)                 | 471 (67.9%) | 122 (17.6%) | 694   | 32.2           |
|                                    | ≥10%    | 1 (0.1%)                    | 74 (15.5%)  | 403 (84.3%) | 478   | 15.6           |
| Total                              |         |                             |             |             | 2,155 |                |

**Supplemental Table 2J. Reclassification Tables for Clinical Model + LA + HbA1c + UACR vs Clinical Model**

| Stroke                  |         | Clinical Model + LA + HbA1c + UACR |            |            | Total | % Reclassified |
|-------------------------|---------|------------------------------------|------------|------------|-------|----------------|
|                         |         | <5%                                | 5-9.99%    | ≥10%       |       |                |
| Clinical Model<br>N (%) | <5%     | 17 (65.4%)                         | 9 (34.6%)  | 0 (0%)     | 26    | 34.6           |
|                         | 5-9.99% | 11 (21.2%)                         | 23 (44.2%) | 18 (34.6%) | 52    | 55.8           |
|                         | ≥10%    | 0 (0%)                             | 9 (17.0%)  | 44 (83.0%) | 53    | 17.0           |
| Total                   |         |                                    |            |            | 131   |                |

| No Stroke               |         | Clinical Model + LA + HbA1c + UACR |             |             | Total | % Reclassified |
|-------------------------|---------|------------------------------------|-------------|-------------|-------|----------------|
|                         |         | <5%                                | 5-9.99%     | ≥10%        |       |                |
| Clinical Model<br>N (%) | <5%     | 819 (83.9%)                        | 146 (15.0%) | 11 (1.1%)   | 976   | 16.1           |
|                         | 5-9.99% | 206 (28.0%)                        | 391 (53.2%) | 138 (18.8%) | 735   | 46.8           |
|                         | ≥10%    | 15 (3.4%)                          | 102 (23.0%) | 327 (73.6%) | 444   | 26.4           |
| Total                   |         |                                    |             |             | 2,155 |                |

**Supplemental Table 2K. Reclassification Tables for Clinical Model + LA + HbA1c + UACR vs Clinical Model + HbA1c**

| Stroke                          |         | Clinical Model + LA + HbA1c + UACR |            |            | Total | % Reclassified |
|---------------------------------|---------|------------------------------------|------------|------------|-------|----------------|
|                                 |         | <5%                                | 5-9.99%    | ≥10%       |       |                |
| Clinical Model + HbA1c<br>N (%) | <5%     | 21 (63.6%)                         | 12 (36.4%) | 0 (0%)     | 33    | 36.4           |
|                                 | 5-9.99% | 7 (15.2%)                          | 24 (52.2%) | 15 (32.6%) | 46    | 47.8           |
|                                 | ≥10%    | 0 (0%)                             | 5 (9.6%)   | 47 (90.4%) | 52    | 9.6            |
| Total                           |         |                                    |            |            | 131   |                |

| No Stroke                       |         | Clinical Model + LA + HbA1c + UACR |             |             | Total | % Reclassified |
|---------------------------------|---------|------------------------------------|-------------|-------------|-------|----------------|
|                                 |         | <5%                                | 5-9.99%     | ≥10%        |       |                |
| Clinical Model + HbA1c<br>N (%) | <5%     | 933 (85.2%)                        | 158 (14.4%) | 4 (0.4%)    | 1095  | 14.8           |
|                                 | 5-9.99% | 106 (16.0%)                        | 421 (63.4%) | 137 (20.6%) | 664   | 36.6           |
|                                 | ≥10%    | 1 (0.3%)                           | 60 (15.2%)  | 335 (84.6%) | 396   | 15.5           |
| Total                           |         |                                    |             |             | 2,155 |                |

**Supplemental Table 2L Reclassification Tables for Clinical Model + LA + HbA1c + UACR vs Clinical Model + HbA1 + UACR**

| Stroke                                 |         | Clinical Model + LA + HbA1c + UACR |            |            | Total | % Reclassified |
|----------------------------------------|---------|------------------------------------|------------|------------|-------|----------------|
|                                        |         | <5%                                | 5-9.99%    | ≥10%       |       |                |
| Clinical Model + HbA1c + UACR<br>N (%) | <5%     | 20 (74.1%)                         | 7 (25.9%)  | 0 (0%)     | 27    | 25.9           |
|                                        | 5-9.99% | 8 (18.2%)                          | 27 (61.4%) | 9 (20.5%)  | 44    | 38.7           |
|                                        | ≥10%    | 0 (0%)                             | 7 (11.7%)  | 53 (88.3%) | 60    | 11.7           |
| Total                                  |         |                                    |            |            | 131   |                |

| No Stroke                              |         | Clinical Model + LA + HbA1c + UACR |             |             | Total | % Reclassified |
|----------------------------------------|---------|------------------------------------|-------------|-------------|-------|----------------|
|                                        |         | <5%                                | 5-9.99%     | ≥10%        |       |                |
| Clinical Model + HbA1c + UACR<br>N (%) | <5%     | 897 (90.5%)                        | 94 (9.5%)   | 0 (0%)      | 991   | 9.5            |
|                                        | 5-9.99% | 143 (20.9%)                        | 462 (67.5%) | 79 (11.5%)  | 684   | 32.4           |
|                                        | ≥10%    | 0 (0%)                             | 83 (17.3%)  | 397 (82.7%) | 480   | 17.3           |
| Total                                  |         |                                    |             |             | 2,155 |                |

**Supplemental Table 2M. Reclassification Tables for Clinical Model + LA + MAC + HbA1c vs Clinical Model**

| Stroke                  |         | Clinical Model + LA + MAC + HbA1c |            |            | Total | % Reclassified |
|-------------------------|---------|-----------------------------------|------------|------------|-------|----------------|
|                         |         | <5%                               | 5-9.99%    | ≥10%       |       |                |
| Clinical Model<br>N (%) | <5%     | 19 (73.1%)                        | 6 (23.1%)  | 1 (3.8%)   | 26    | 26.9           |
|                         | 5-9.99% | 10 (19.2%)                        | 21 (40.4%) | 21 (40.4%) | 52    | 59.6           |
|                         | ≥10%    | 0 (0%)                            | 6 (11.3%)  | 47 (88.7%) | 53    | 11.3           |
| Total                   |         |                                   |            |            | 131   |                |

| No Stroke               |         | Clinical Model + LA + MAC + HbA1c |             |             | Total | % Reclassified |
|-------------------------|---------|-----------------------------------|-------------|-------------|-------|----------------|
|                         |         | <5%                               | 5-9.99%     | ≥10%        |       |                |
| Clinical Model<br>N (%) | <5%     | 796 (81.6%)                       | 170 (17.4%) | 10 (1.0%)   | 976   | 18.4           |
|                         | 5-9.99% | 169 (23.0%)                       | 405 (55.1%) | 161 (21.9%) | 735   | 44.9           |
|                         | ≥10%    | 9 (2.0%)                          | 99 (22.3%)  | 336 (75.7%) | 444   | 24.3           |
| Total                   |         |                                   |             |             | 2,155 |                |

**Supplemental Table 2N. Reclassification Tables for Clinical Model + LA + MAC + HbA1c vs Clinical Model + HbA1c**

| Stroke                             |         | Clinical Model + LA + MAC + HbA1c |            |            | Total | % Reclassified |
|------------------------------------|---------|-----------------------------------|------------|------------|-------|----------------|
|                                    |         | <5%                               | 5-9.99%    | ≥10%       |       |                |
| Clinical Model +<br>HbA1c<br>N (%) | <5%     | 24 (72.7%)                        | 9 (27.3%)  | 0 (0%)     | 33    | 27.3           |
|                                    | 5-9.99% | 5 (10.9%)                         | 21 (45.7%) | 20 (43.5%) | 46    | 54.4           |
|                                    | ≥10%    | 0 (0%)                            | 3 (5.8%)   | 49 (94.2%) | 52    | 5.8            |
| Total                              |         |                                   |            |            | 131   |                |

| No Stroke                          |         | Clinical Model + LA + MAC + HbA1c |             |             | Total | % Reclassified |
|------------------------------------|---------|-----------------------------------|-------------|-------------|-------|----------------|
|                                    |         | <5%                               | 5-9.99%     | ≥10%        |       |                |
| Clinical Model +<br>HbA1c<br>N (%) | <5%     | 900 (82.2%)                       | 192 (17.5%) | 3 (0.3%)    | 1095  | 17.8           |
|                                    | 5-9.99% | 74 (11.1%)                        | 436 (65.7%) | 154 (23.2%) | 664   | 34.3           |
|                                    | ≥10%    | 0 (0%)                            | 46 (11.6%)  | 350 (88.4%) | 396   | 11.6           |
| Total                              |         |                                   |             |             | 2,155 |                |

**Supplemental Table 2O. Reclassification Tables for Clinical Model + LA + MAC + HbA1c + UACR vs Clinical Model**

| Stroke                  |         | Clinical Model + LA + MAC + HbA1c + UACR |            |            | Total | % Reclassified |
|-------------------------|---------|------------------------------------------|------------|------------|-------|----------------|
|                         |         | <5%                                      | 5-9.99%    | ≥10%       |       |                |
| Clinical Model<br>N (%) | <5%     | 17 (65.4%)                               | 8 (30.8%)  | 1 (3.8%)   | 26    | 34.6           |
|                         | 5-9.99% | 10 (19.2%)                               | 21 (40.4%) | 21 (40.4%) | 52    | 59.6           |
|                         | ≥10%    | 0 (0%)                                   | 8 (15.1%)  | 45 (84.9%) | 53    | 15.1           |
| Total                   |         |                                          |            |            | 131   |                |

| No Stroke               |         | Clinical Model + LA + MAC + HbA1c + UACR |             |             | Total | % Reclassified |
|-------------------------|---------|------------------------------------------|-------------|-------------|-------|----------------|
|                         |         | <5%                                      | 5-9.99%     | ≥10%        |       |                |
| Clinical Model<br>N (%) | <5%     | 800 (82.0%)                              | 162 (16.6%) | 14 (1.4%)   | 976   | 18.0           |
|                         | 5-9.99% | 179 (24.4%)                              | 393 (53.5%) | 163 (22.2%) | 735   | 46.6           |
|                         | ≥10%    | 11 (2.5%)                                | 95 (21.4%)  | 338 (76.1%) | 444   | 23.9           |
| Total                   |         |                                          |             |             | 2,155 |                |

**Supplemental Table 2P. Reclassification Tables for Clinical Model ++ LA + MAC + HbA1c + UACR vs Clinical Model + HbA1c + UACR**

| Stroke                                    |         | Clinical Model + LA + MAC + HbA1c + UACR |            |            | Total | % Reclassified |
|-------------------------------------------|---------|------------------------------------------|------------|------------|-------|----------------|
|                                           |         | <5%                                      | 5-9.99%    | ≥10%       |       |                |
| Clinical Model +<br>HbA1c + UACR<br>N (%) | <5%     | 20 (74.1%)                               | 7 (25.9%)  | 0 (0%)     | 27    | 25.9           |
|                                           | 5-9.99% | 7 (15.9%)                                | 24 (54.5%) | 13 (39.5%) | 44    | 45.4           |
|                                           | ≥10%    | 0 (0%)                                   | 6 (10.0%)  | 90.0%)     | 60    | 10.0           |
| Total                                     |         |                                          |            |            | 131   |                |

| No Stroke                                 |         | Clinical Model + LA + MAC + HbA1c + UACR |             |             | Total | % Reclassified |
|-------------------------------------------|---------|------------------------------------------|-------------|-------------|-------|----------------|
|                                           |         | <5%                                      | 5-9.99%     | ≥10%        |       |                |
| Clinical Model +<br>HbA1c + UACR<br>N (%) | <5%     | 872 (88.0%)                              | 118 (11.9%) | 1 (0.1%)    | 991   | 12.0           |
|                                           | 5-9.99% | 118 (17.3%)                              | 464 (67.8%) | 102 (14.9%) | 684   | 32.2           |
|                                           | ≥10%    | 0 (0%)                                   | 68 (14.2%)  | 412 (85.8%) | 480   | 14.2           |
| Total                                     |         |                                          |             |             | 2,155 |                |



**Table 2Q. Reclassification Tables for Clinical Model + LA + MAC + HbA1c + UACR vs Clinical Model + LA + HbA1c**

| Stroke                               |         | Clinical Model + LA + MAC + HbA1c + UACR |            |            | Total | % Reclassified |
|--------------------------------------|---------|------------------------------------------|------------|------------|-------|----------------|
|                                      |         | <5%                                      | 5-9.99%    | ≥10%       |       |                |
| Clinical Model + LA + HbA1c<br>N (%) | <5%     | 24 (88.9%)                               | 3 (11.1%)  | 0 (0%)     | 27    | 11.1           |
|                                      | 5-9.99% | 3 (8.1%)                                 | 29 (78.4%) | 5 (13.5%)  | 37    | 21.6           |
|                                      | ≥10%    | 0 (0%)                                   | 5 (7.5%)   | 62 (92.5%) | 67    | 7.5            |
| Total                                |         |                                          |            |            | 131   |                |

| No Stroke                            |         | Clinical Model + LA + MAC + HbA1c + UACR |             |             | Total | % Reclassified |
|--------------------------------------|---------|------------------------------------------|-------------|-------------|-------|----------------|
|                                      |         | <5%                                      | 5-9.99%     | ≥10%        |       |                |
| Clinical Model + LA + HbA1c<br>N (%) | <5%     | 900 (94.9%)                              | 48 (5.1%)   | 0 (0%)      | 948   | 5.1            |
|                                      | 5-9.99% | 90 (13.2%)                               | 535 (78.6%) | 56 (8.2%)   | 681   | 21.4           |
|                                      | ≥10%    | 0 (0%)                                   | 67 (12.7%)  | 459 (87.3%) | 526   | 12.7           |
| Total                                |         |                                          |             |             | 2,155 |                |

**Table 2R. Reclassification Tables for Clinical Model + LA + MAC + HbA1c + UACR vs Clinical Model + LA + MAC + HbA1c**

| Stroke                                      |         | Clinical Model + LA + MAC + HbA1c + UACR |            |            | Total | % Reclassified |
|---------------------------------------------|---------|------------------------------------------|------------|------------|-------|----------------|
|                                             |         | <5%                                      | 5-9.99%    | ≥10%       |       |                |
| Clinical Model<br>LA + MAC + HbA1c<br>N (%) | <5%     | 25 (86.2%)                               | 4 (13.8%)  | 0 (0%)     | 29    | 13.8           |
|                                             | 5-9.99% | 2 (6.1%)                                 | 29 (87.9%) | 2 (6.1%)   | 33    | 12.2           |
|                                             | ≥10%    | 0 (0%)                                   | 4 (5.8%)   | 65 (94.2%) | 69    | 5.8            |
| Total                                       |         |                                          |            |            | 131   |                |

| No Stroke                                   |         | Clinical Model + LA + MAC + HbA1c + UACR |             |             | Total | % Reclassified |
|---------------------------------------------|---------|------------------------------------------|-------------|-------------|-------|----------------|
|                                             |         | <5%                                      | 5-9.99%     | ≥10%        |       |                |
| Clinical Model<br>LA + MAC + HbA1c<br>N (%) | <5%     | 919 (94.4%)                              | 55 (5.6%)   | 0 (0%)      | 974   | 5.6            |
|                                             | 5-9.99% | 71 (10.5%)                               | 554 (82.2%) | 49 (7.3%)   | 674   | 17.7           |
|                                             | ≥10%    | 0 (0%)                                   | 41 (8.1%)   | 466 (91.9%) | 507   | 7.9            |
| Total                                       |         |                                          |             |             | 2,155 |                |
